# Supplementary material
Source: PubMed Central journal article supplement (PMC4421094)
Supplement: NIHMS670675-supplement-2.pdf [file NIHMS670675-supplement-2.pdf]

*Developmental Cell*

Supplemental Information

# **A Family of Tetraspans Organizes Cargo for Sorting into Multivesicular Bodies**

Chris MacDonald, Johanna A. Payne, Mariam Aboian, William Smith,  
David J. Katzmann, Robert C. Piper

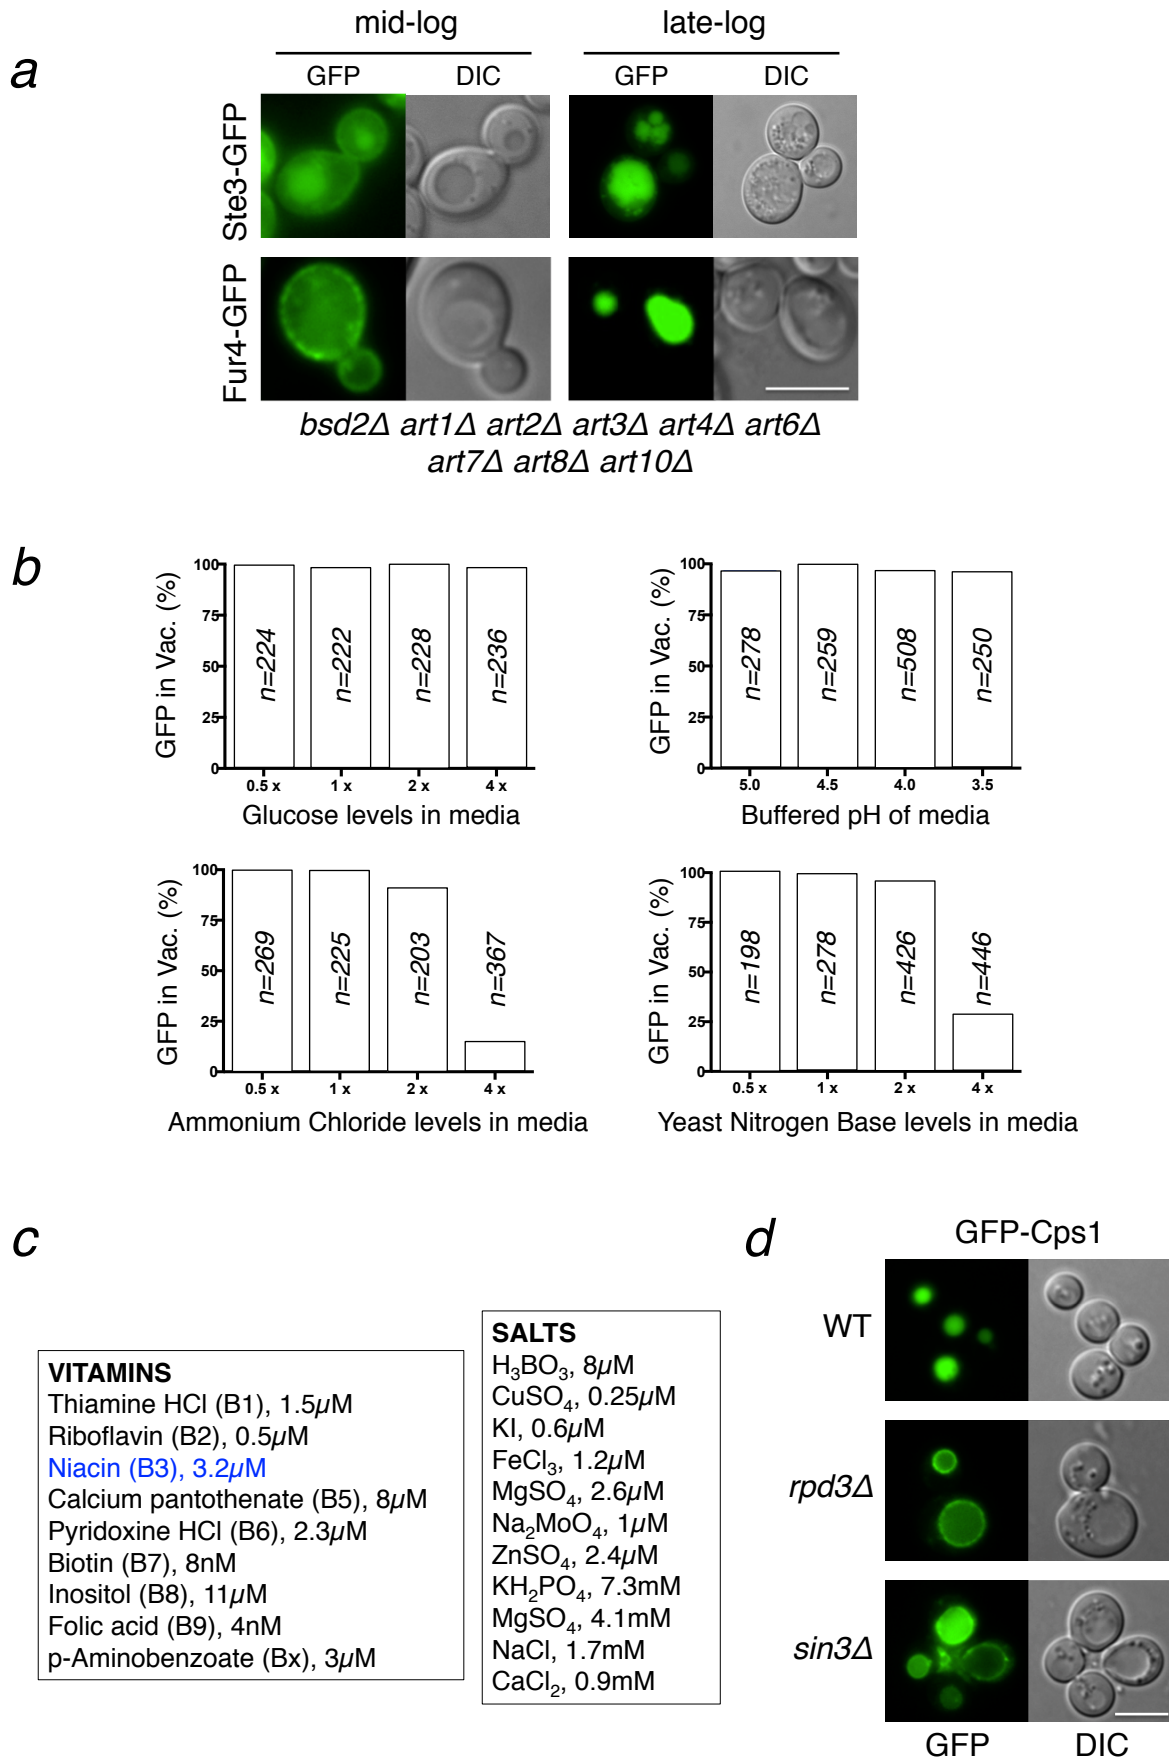

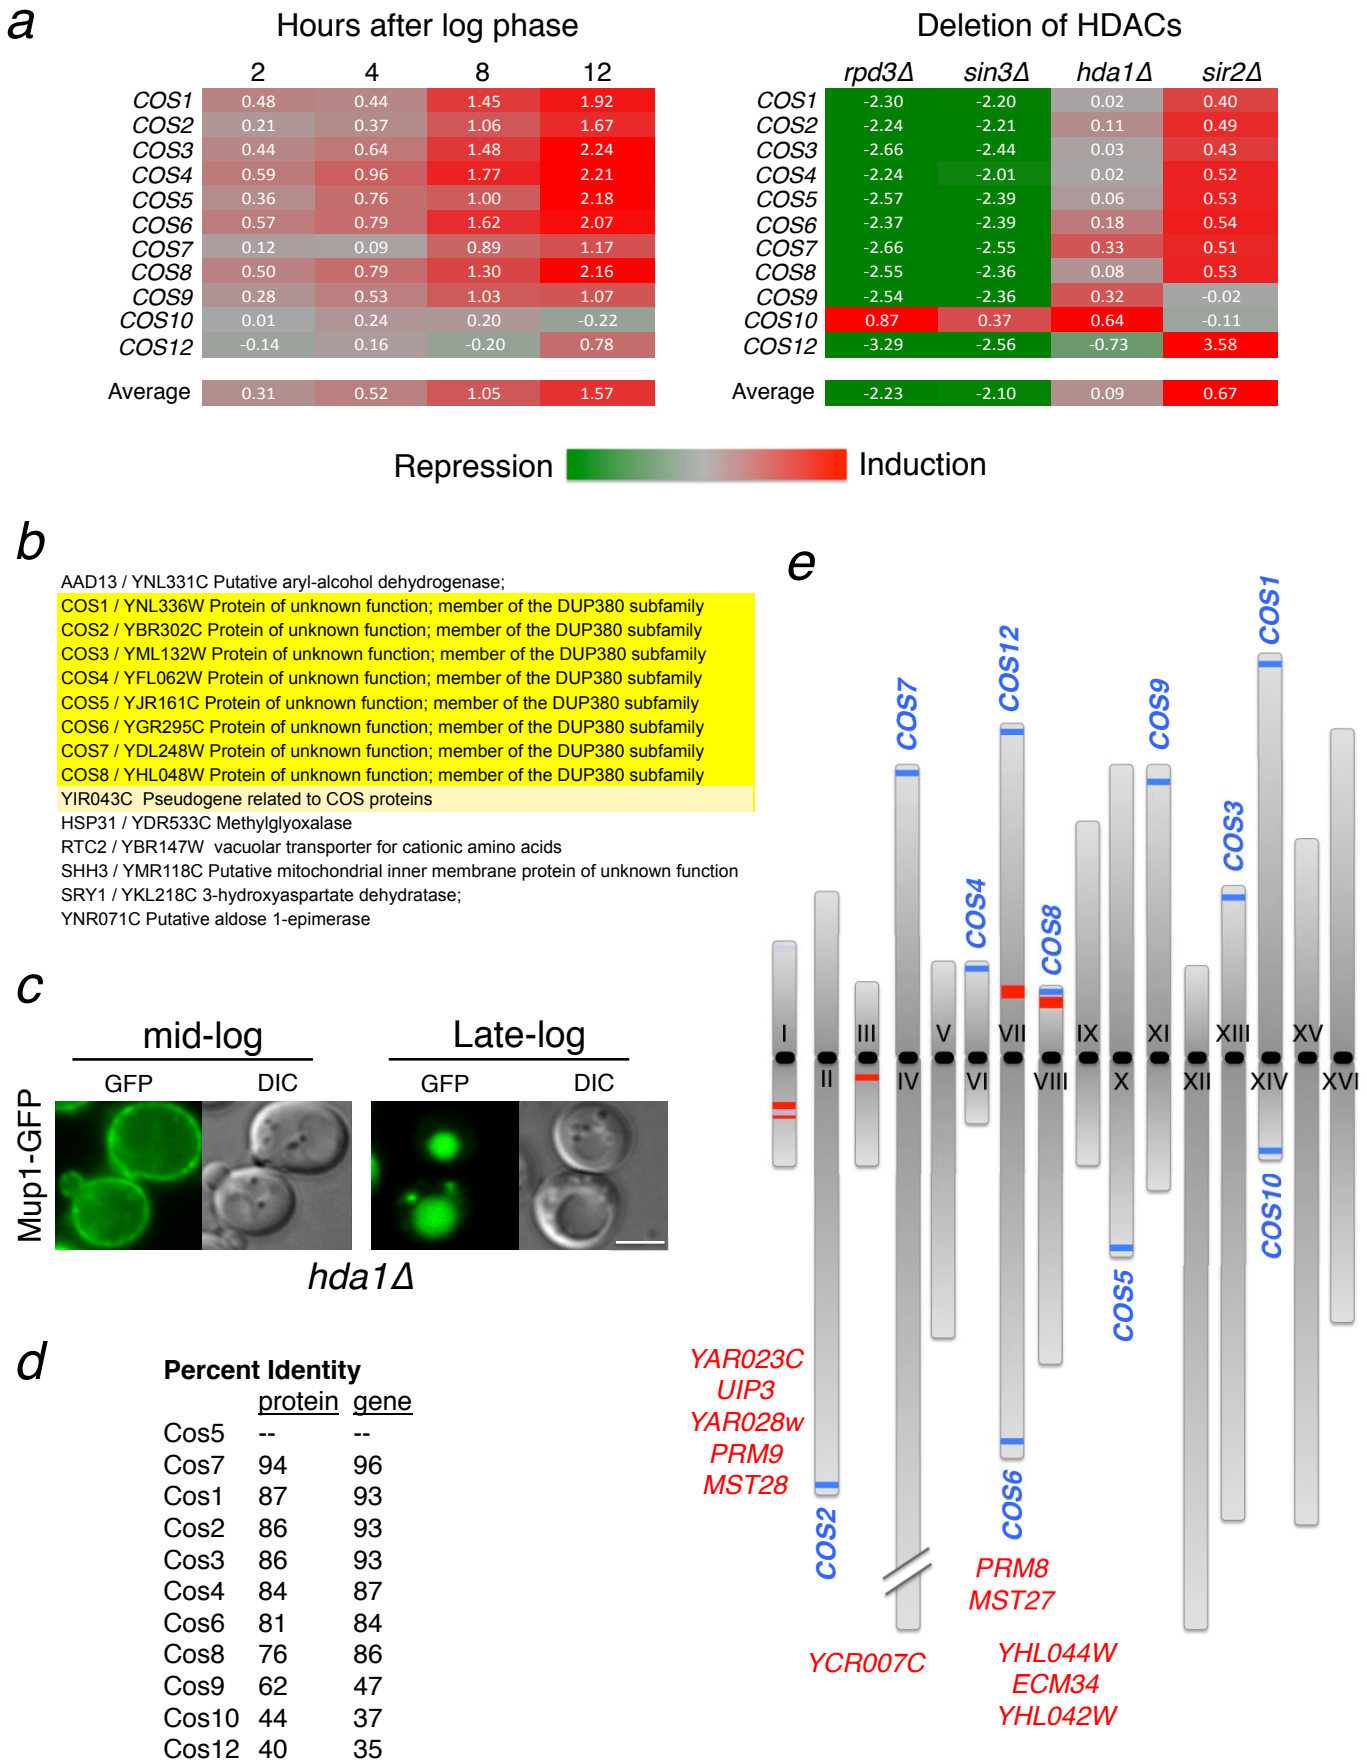

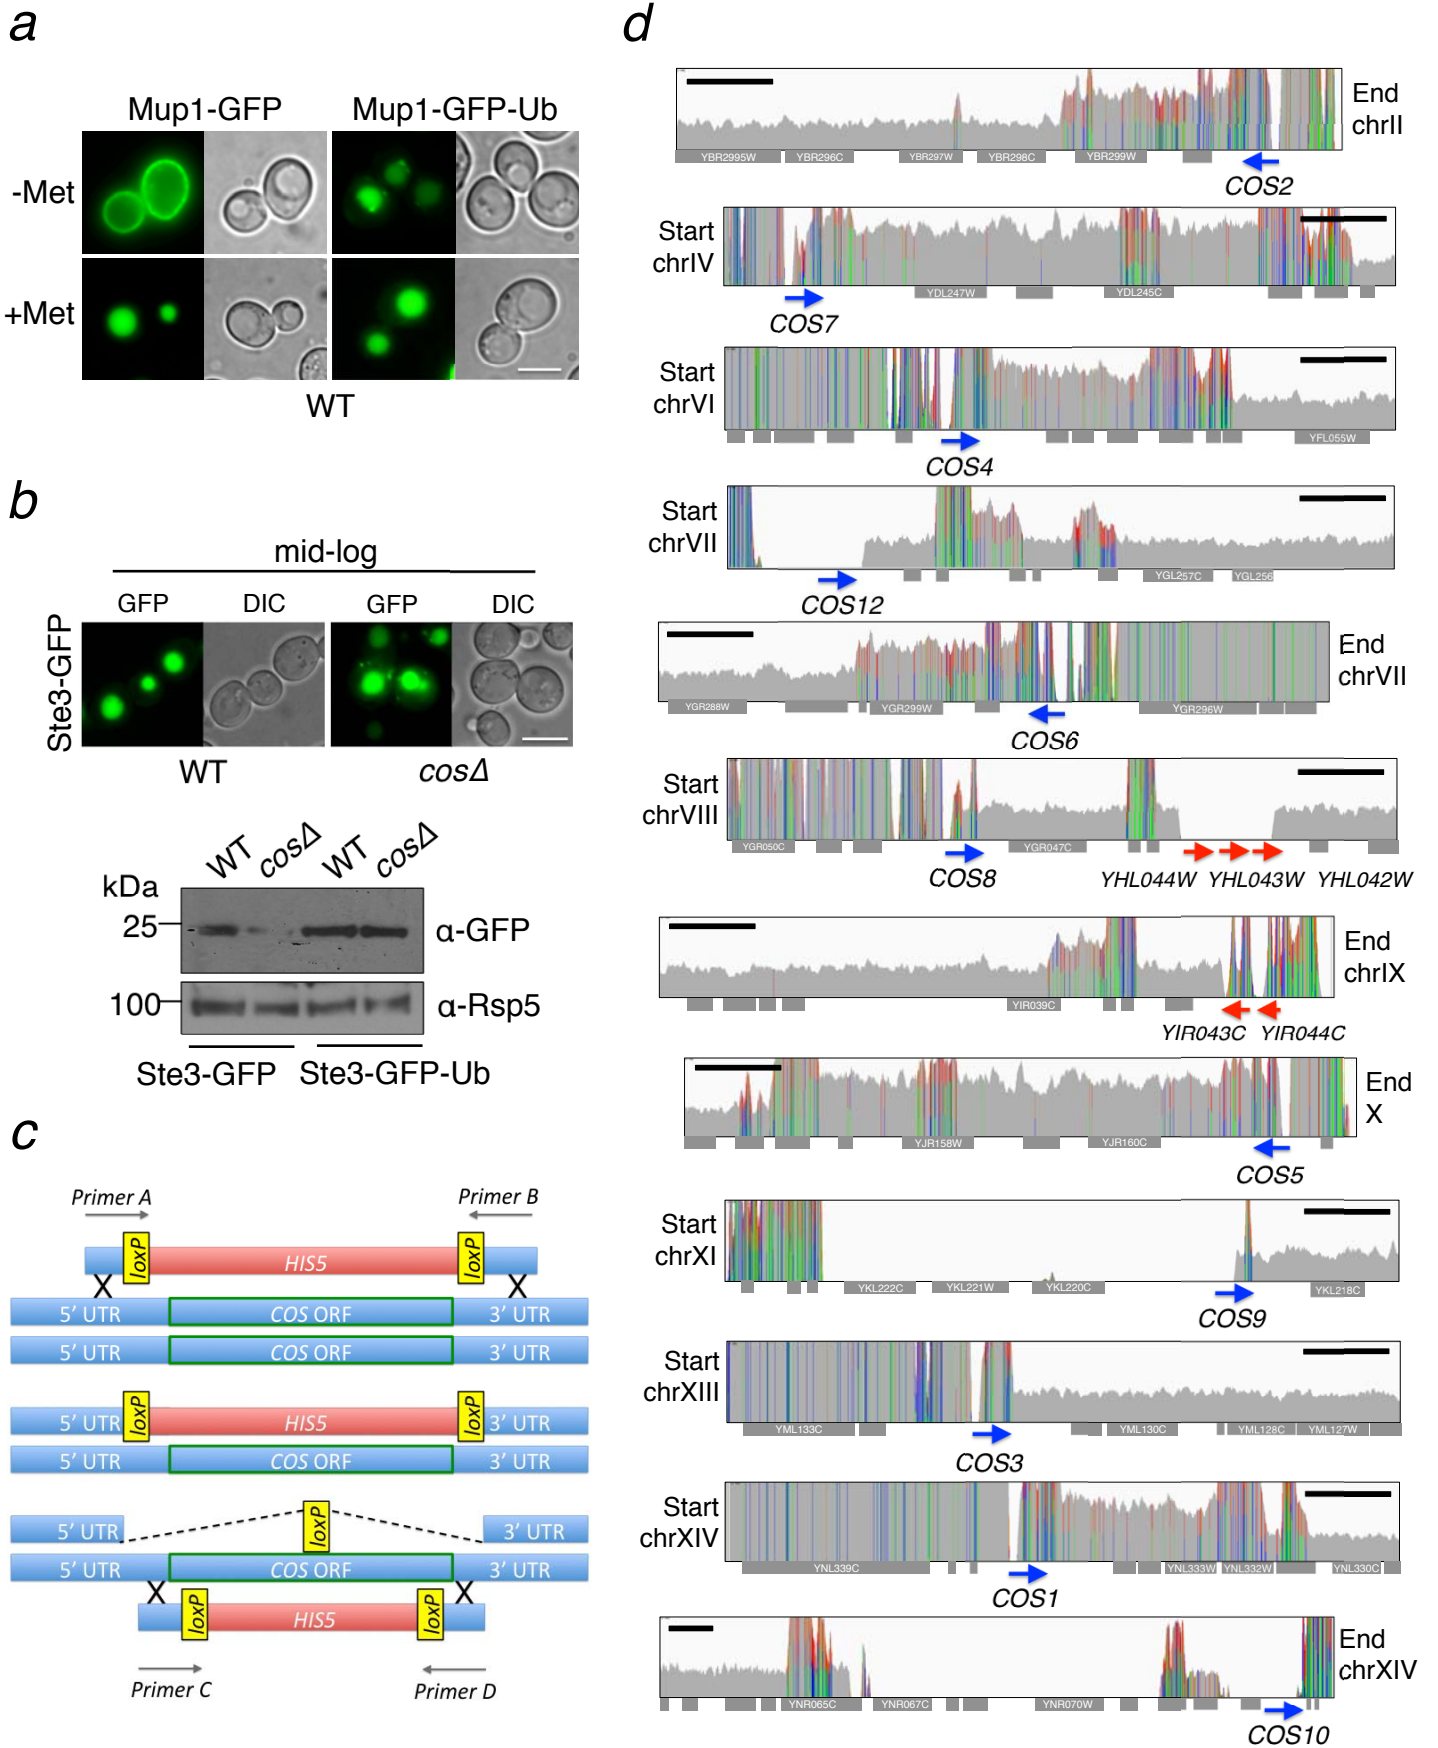

**a**

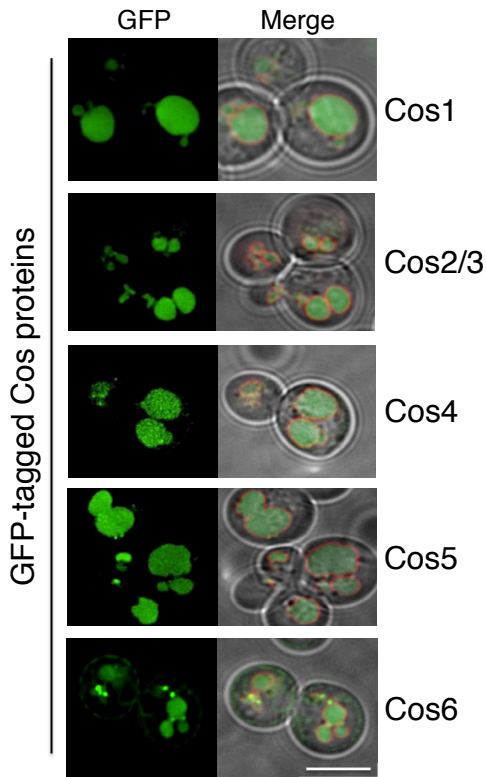

**b**

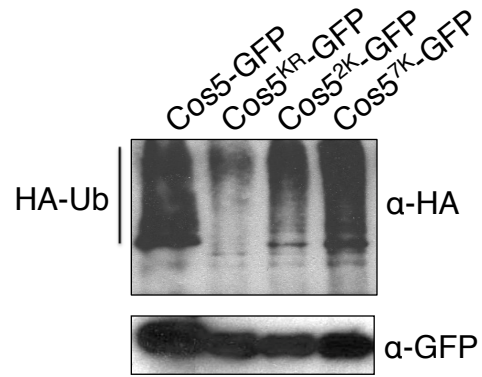

**c**

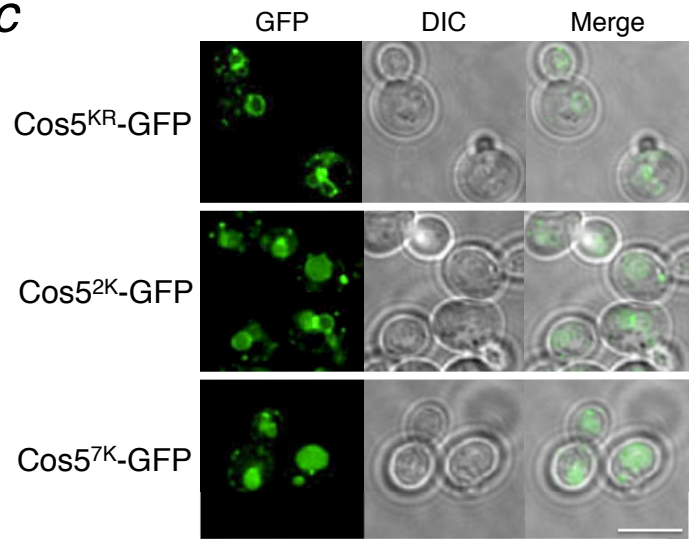

**d**

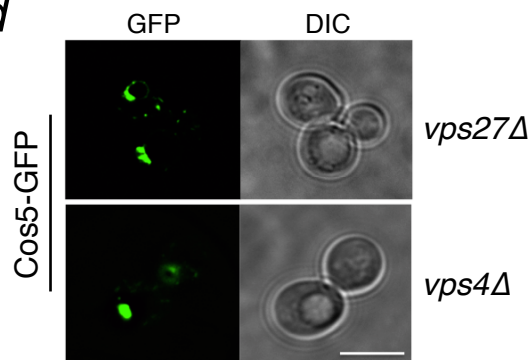

**e**

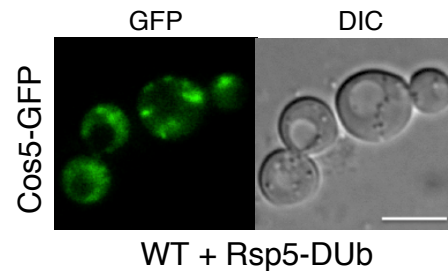

**f**

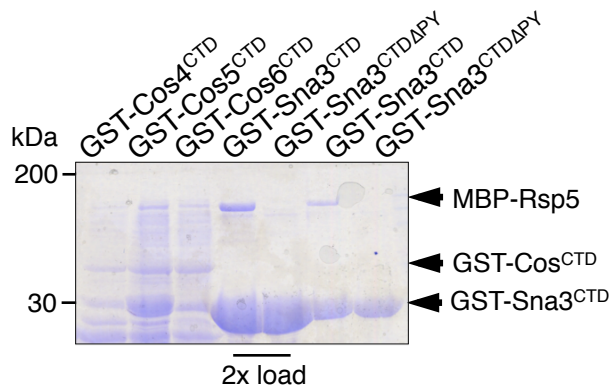

**g**

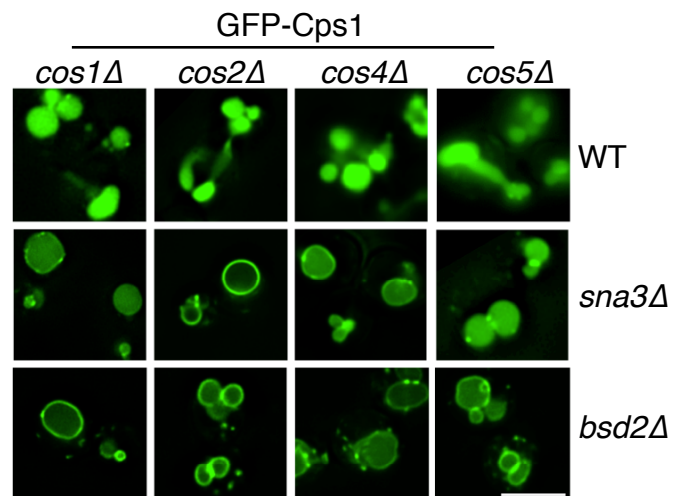

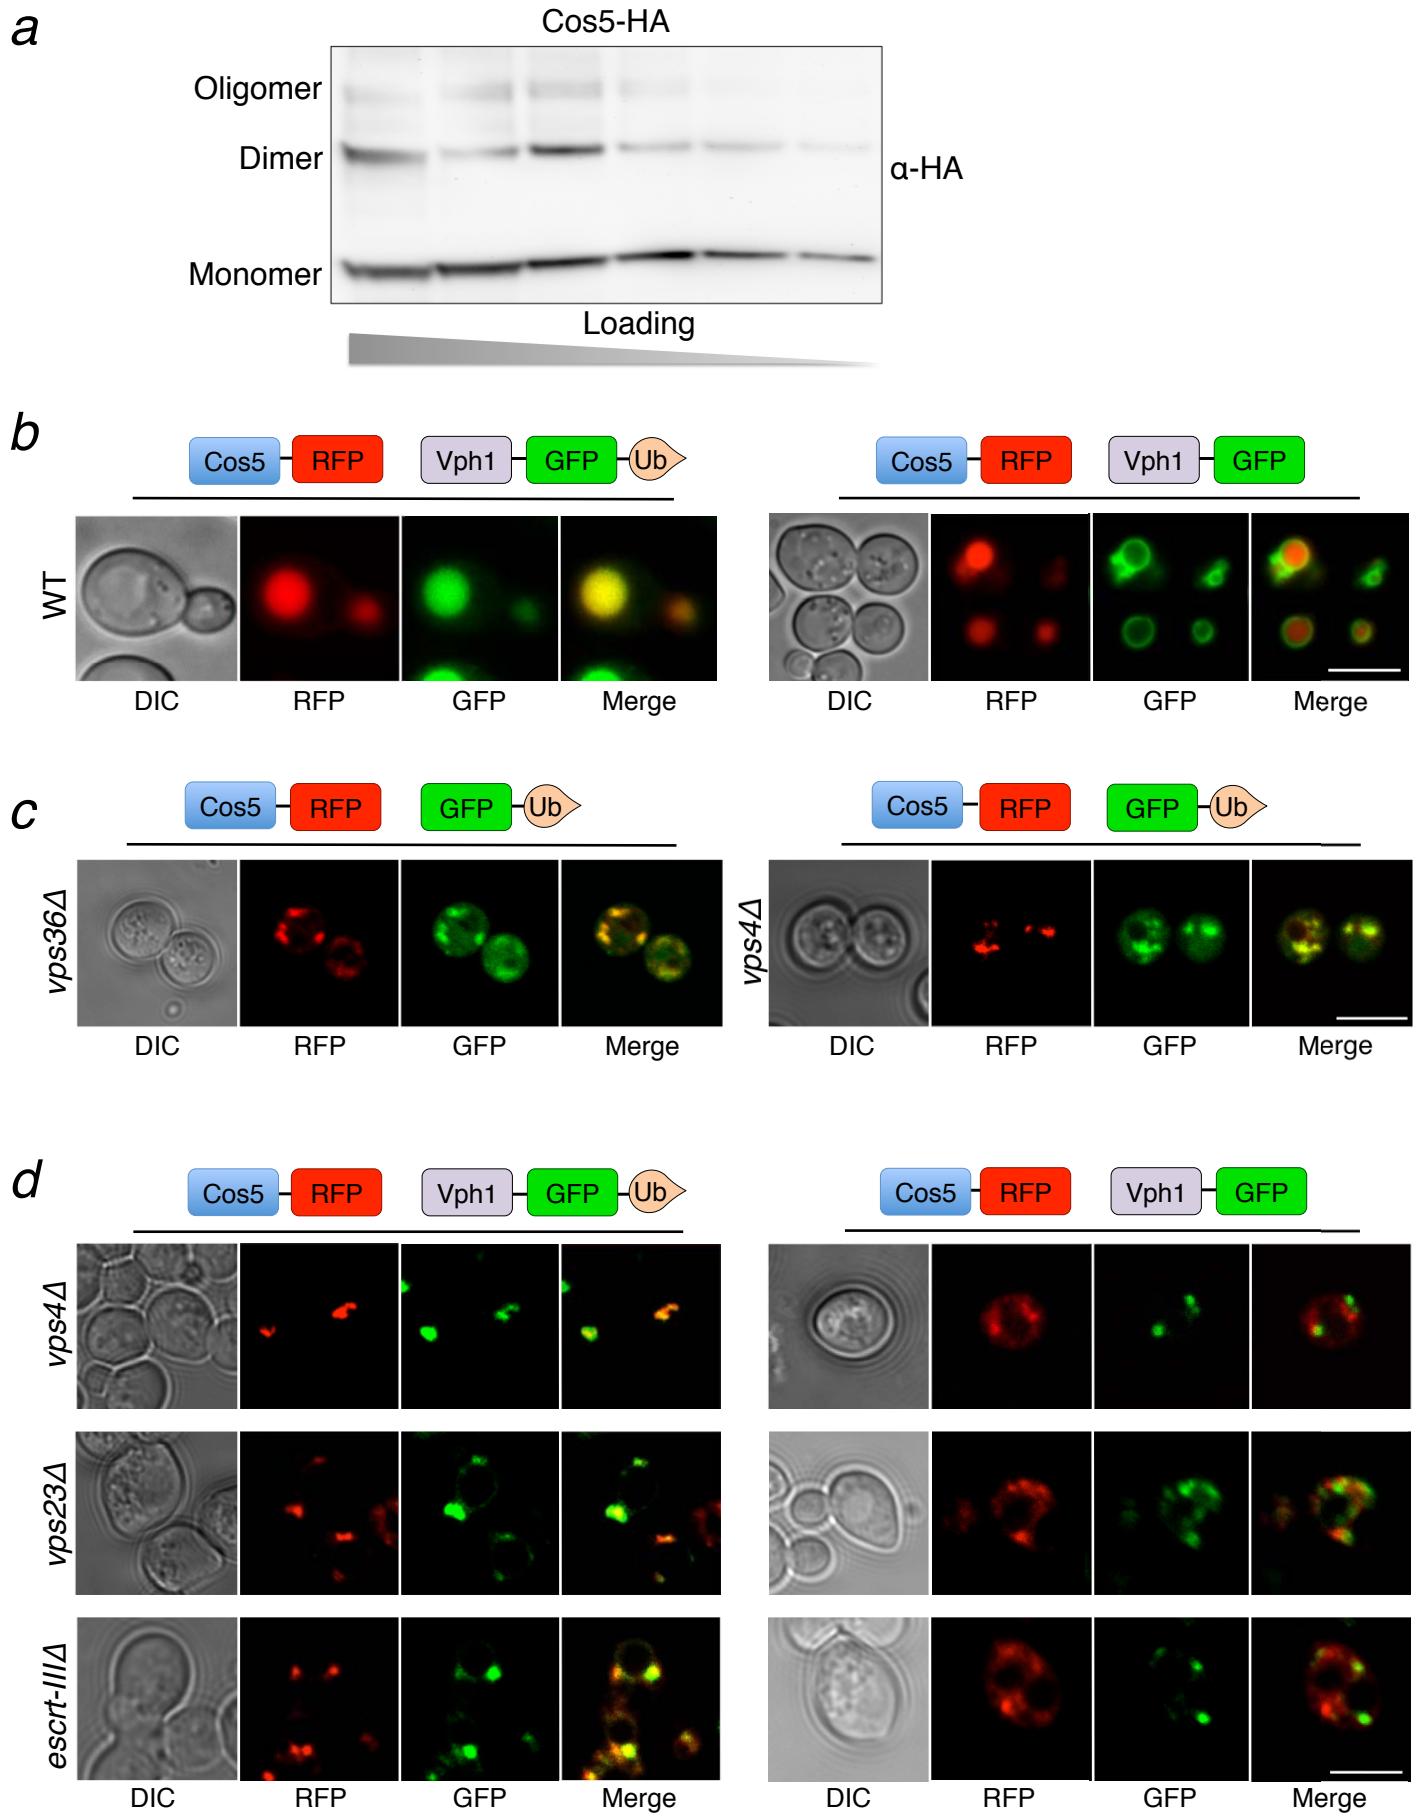

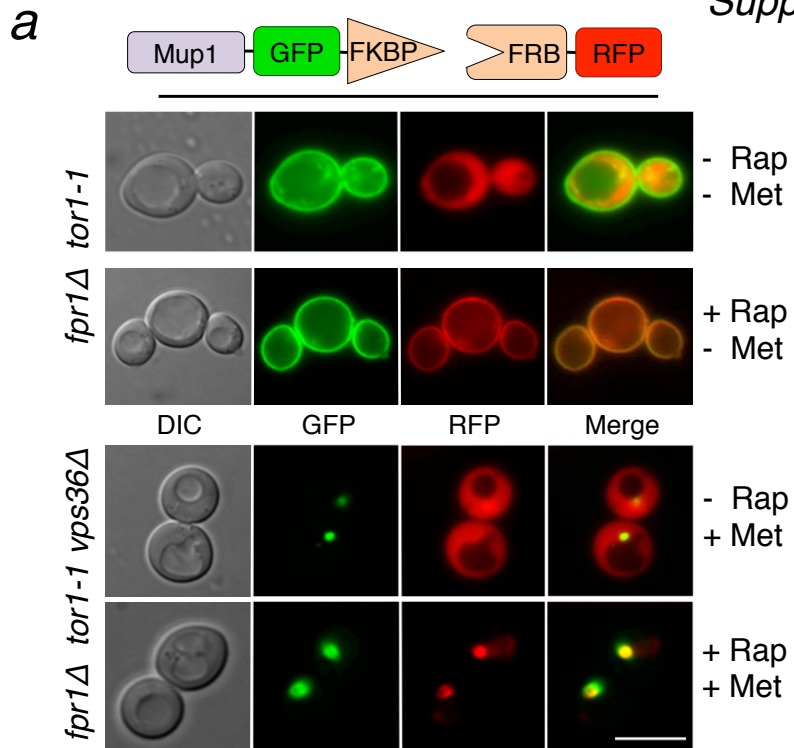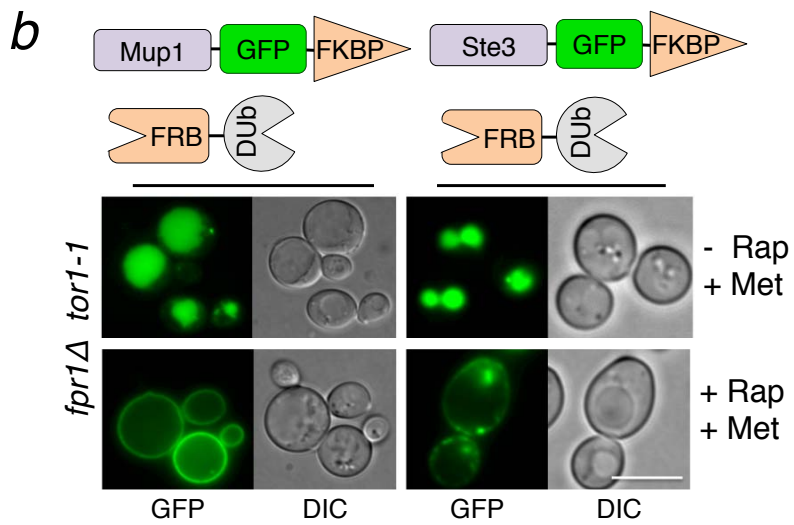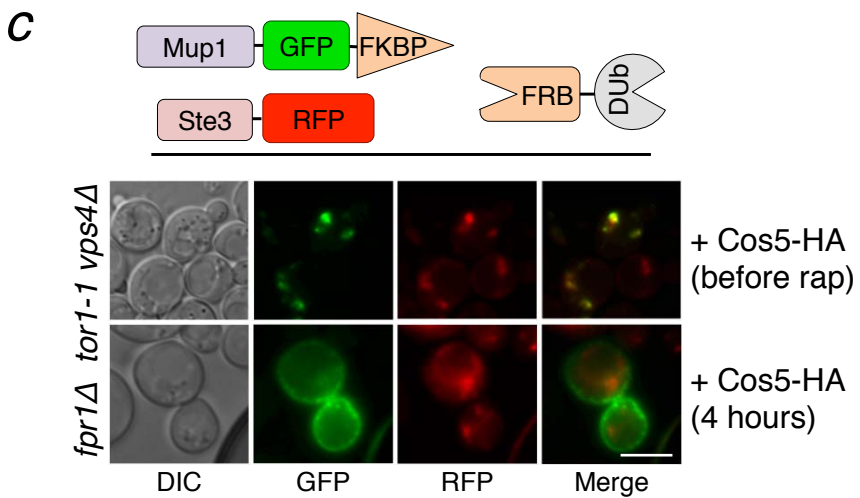

**a**

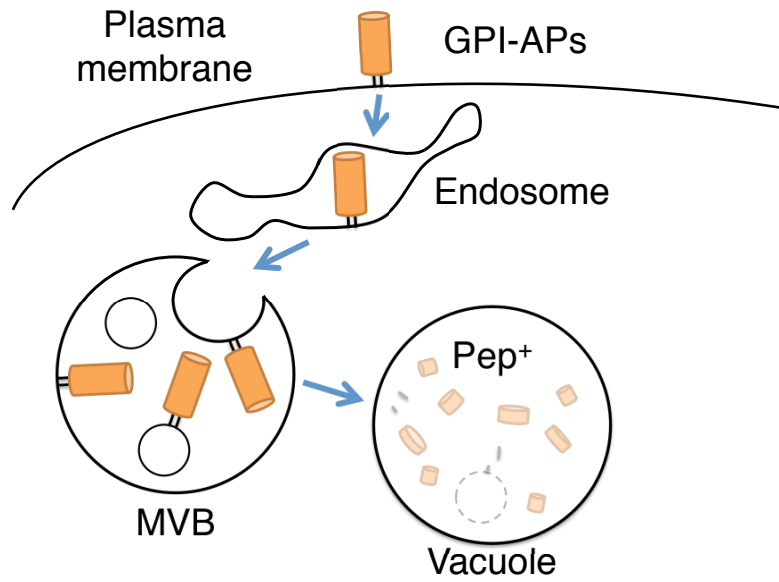

**b**

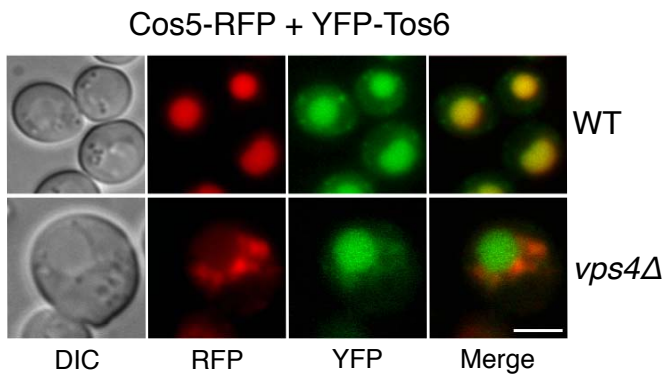

**c**

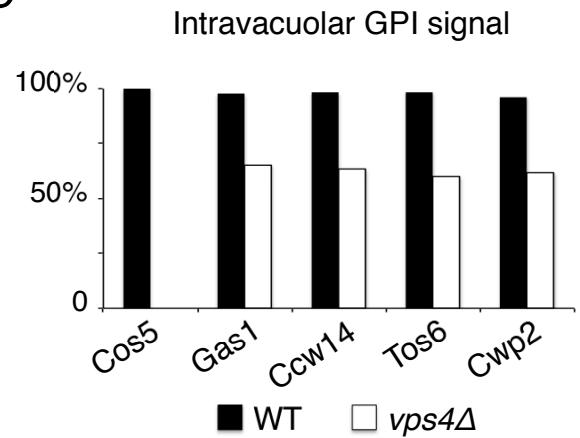

**d**

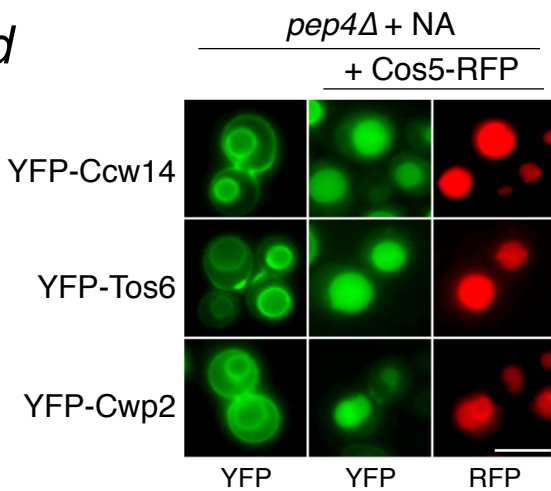

**e**

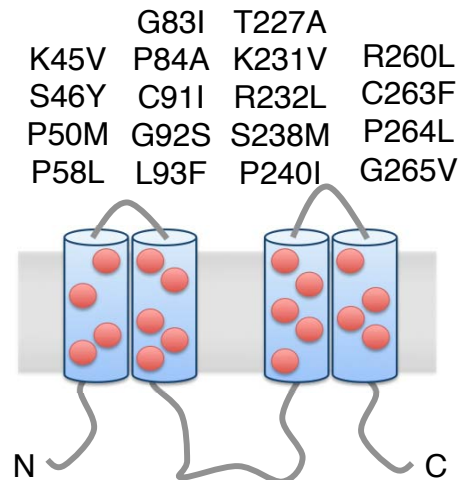



## Supplementary figure legends

### Figure S1, related to Figure 1: Effect of media composition, *RPD3* $\Delta$ , and *SIN3* $\Delta$ on MVB sorting

a) Localization of additional GFP-tagged cargo proteins in mutant cells lacking 9 known Rsp5 adaptor proteins grown to mid- and late-log phase ( $OD_{600} = 1.0$  and  $2.0$ , respectively). Ste3-GFP is normally rapidly sent to the vacuole for degradation. The low levels of Ste3-GFP on the plasma membrane in cells grown to mid-log phase are absent in cells grown to late-log phase. Fur4-GFP is primarily at the cell surface in mid-log grown cells, but is completely re-localized to the vacuole in cells grown to late-log phase.

b) Cells expressing Mup1-GFP were grown to late-log phase in standard SD-Met media (2% glucose, 5 g/L ammonium sulphate, 1x vitamin base mixture), and also media that was depleted (0.5x) or supplemented (2x and 4x) with glucose, ammonium chloride, yeast nitrogen base, or buffered protons. The percentage of cells ( $n =$  indicated for each condition) showing GFP in vacuole lumen was quantified. We found changes in glucose levels and pH had no effect on Mup1-GFP sorting. Supplementing nitrogen decreased Mup1-GFP sorting to the vacuole consistent with the finding that amino acid levels control down-regulation of transporters through the TORC1 pathway (MacGurn et al., 2011). We also find the vitamin base mixture suppresses Mup1 vacuolar sorting, specifically the NAD precursor Nicotinic Acid (NA).

c) Components in Yeast Nitrogen Base, which at higher concentrations suppresses the delivery of Mup1-GFP to the vacuole when cells are grown to late-log phase.

d) GFP-Cps1 localization in wild-type cells, *RPD3* $\Delta$  and *SIN3* $\Delta$  null mutant cells. Bar 5  $\mu$ M.

### Figure S2, related to Figure 2: COS gene regulation by HDACs

We found vacuolar delivery of cell surface membrane proteins could be accelerated by growth past log phase and modulated by two opposing transcription factors (accelerated by deletion of *SIR2* and attenuated by deletion of *RPD3*). These criteria were used to cross-reference existing microarray data and narrow the list of gene products that are transcriptionally activated by growth past log phase and *SIR2* deletion and repressed by *RPD3* deletion.

a) Collated microarray expression data showing gene expression profiles of the *COS* genes as cells are grown past log phase and in the indicated HDAC null mutants: *sir2* $\Delta$ , *hda1* $\Delta$ , *RPD3* $\Delta$  and *SIN3* $\Delta$  (Bedalov et al., 2001; Bernstein et al., 2000; Gasch et al., 2000). Loss of the  $NAD^+$ -

dependent HDAC *SIR2* induces expression of many *COS* genes. Loss of *SIN3* and *RPD3*, encoding components of a NAD<sup>+</sup>-independent HDAC complex, suppresses *COS* gene expression. Deletion of *HDA1*, another HDAC, had no effect on *COS* gene expression. The average values from duplicate experiments are displayed. The relative values are conditionally formatted, with green indicating strongest repression, red indicating strongest induction and grey as no change in expression. *COS* genes share extremely high levels of homology; it is therefore difficult to specifically generate expression profiles for each family member, for this reason average change across all *COS* genes is also shown.

b) List of the 15 genes that increase expression upon entry towards stationary phase and upon *SIR2* deletion, and decrease upon loss of *RPD3*.

c) Deletion of the HDAC gene *HDA1* has no effect on *COS* gene expression (a) or the down-regulation of Mup1-GFP to the vacuole in cultures grown to late-log phase.

d) *Cos5* was chosen as a representative member of the *Cos* family for functional studies. Shown here are the levels of identity between *COS5* and the other family members at the deduced amino acid level (protein) and at the nucleotide level (gene), homology of which is calculated from 1000 bp upstream of the start codon to end of the ORF.

e) Schematic diagram of yeast chromosomes and the location of *COS* genes (blue) and the *DUP240* family members (red). Bar 5  $\mu$ M.

### **Figure S3, related to Figure 3: Generation of *cos* $\Delta$ mutant cells**

a) Mup1-GFP is localized to the cell surface in exponentially dividing cells but is efficiently delivered to the vacuole after 1-hour treatment with 20  $\mu$ g/ml methionine. Mup1-GFP-Ub expressed in wild-type cells is found largely in the vacuole, even in cells grown in media lacking methionine.

b) Localization of Ste3-GFP in mid-log phase grown WT and *cos* $\Delta$  mutant cells. Lower, immunoblot of WT and *cos* $\Delta$  cells expressing Ste3-GFP and Ste3-GFP-Ub. Anti-GFP antibodies reveal a processed form of GFP that occurs upon cargo delivery to the vacuole lumen. The loading control with  $\alpha$ -Rsp5 antibodies confirms no changes in the levels of Rsp5.

c) Scheme for disrupting multiple highly homologous *COS* genes. Following first round of deletion, another gene is targeted by virtue of a sequence that is no longer present in the previous deleted gene. By targeting first round of deletions with 2 selectable markers, *HIS5* from *K. lactis* and G418 resistance, each with same homology but selecting for both, therefore

confirming 2 deletions per round prior to expressing *cre*-recombinase to regenerate the selectable markers for subsequent rounds of gene disruption.

d) Genome assembly of the *cosΔ* strain showing disruption of all COS genes and pseudogenes. Paired-end 100 bp Illumina reads from fragmented *cosΔ* genomic DNA library were aligned separately to each of the yeast chromosomes. This artificially increases read depth at the chromosome ends that contain sequences homologous to additional loci. For instance, sequences of many of the COS genes can map to multiple loci. Mapping all genomic sequences to only individual chromosomes separately, however, shows unambiguous disruption of all COS genes. Shown are graphs of the corresponding read depths for each position, the y-axis of each graph totals 600 reads and the black bar indicates 2.5 kbp. The beginning or end of each chromosome is also labeled. The positions of the COS ORFs (blue arrows), COS pseudogenes (red arrows) as well as other annotated ORFs (grey) within the region are indicated. These data also indicate loss a few other sub-telomeric loci. However, the defects of this strain were complemented by overexpressing *Cos5* from a plasmid, indicating that loss of these other regions were not responsible for the MVB sorting defects observed. Bar 5 μm.

#### **Figure S4, related to Figure 4: Characterization of Cos proteins**

- a) Localization of other Cos-GFP fusion proteins in WT cells.
- b) *Cos5*-GFP and *Cos5*<sup>KR</sup>-GFP lacking the lysines within *Cos5*, were immunoprecipitated from lysates of *pep12Δ* cells also expressing HA-Ub using α-GFP antibodies. Immunoprecipitates were immunoblotted with α-GFP and α-HA. Also analyzed were *Cos5*<sup>2K</sup>-GFP and *Cos5*<sup>7K</sup>-GFP in which either 2 or 7 lysines were reintroduced into *Cos5*<sup>KR</sup>-GFP.
- c) Localization of *Cos5*<sup>KR</sup>-GFP, *Cos5*<sup>2K</sup>-GFP, *Cos5*<sup>7K</sup>-GFP in WT cells. Introduction of novel ubiquitination sites restores MVB sorting of *Cos5*<sup>KR</sup>-GFP.
- d) Localization of *Cos5*-GFP in *vps27Δ* and *vps4Δ* mutants. *Cos5*-GFP localizes to mutant endosomal class E compartments.
- e) Localization of *Cos5*-GFP in WT cells expressing a fusion protein of Rsp5 and the catalytic domain of the Ubp7 deubiquitinating enzyme.
- f) Coomassie-stained gel of samples from the recombinant Rsp5 binding experiment in Fig. 4I. Indicated are the positions of intact GST-Cos CTD fusions, GST-Sna3 C-terminal domain fusions, and bound MBP-Rsp5.

g) Synthetic effects of deleting *SNA3* or *BSD2* and other *COS* genes on MVB sorting. Localization of GFP-Cps1 in the indicated single and double null mutants demonstrates a synthetic sorting defect between TMD containing Rsp5 adaptors Sna3 and Bsd2, and the Cos proteins.

#### **Figure S5, related to Figure 5: Sub-compartmentalization within Endosomes**

- a) Immunoblot analysis of Cos5-HA expressed in *pep4Δ* cells using  $\alpha$ -HA. The expected monomeric Cos5-HA is accompanied by a dimeric and higher order oligomeric form, which can be visualized in lanes heavily loaded with lysate.
- b) Vph1-GFP-Ub is directed to the vacuolar lumen, where it co-localizes with Cos5-RFP. Also shown is the differential localization of Cos5-RFP in the vacuole and Vph1-GFP to the limiting membrane of the vacuole
- c) Confocal microscopy of Cos5-RFP and GFP-Ub in mutant *vps36Δ* and *vps4Δ* cells.
- d) Co-localization of Cos5-RFP and either Vph1-GFP or Vph1-GFP-Ub in the indicated class E *vps* / ESCRT mutants.

#### **Figure S6, related to Figure 6: Characterization of the Triggered Recycling Assay**

- a) To demonstrate the utility of this assay we assessed the ability of Mup1-GFP-FKBP to bind FRB fusion proteins upon Rapamycin addition. Shown is localization of Mup1-GFP-FKBP and FRB-RFP in *fpr1Δ tor1-1* cells or *vps36Δ fpr1Δ tor1-1* cells that were treated in the absence or presence of Rapamycin (10  $\mu$ M) for 90 min. Cells carried the *tor1-1* mutation allowing them to grow in the presence of Rapamycin and also lacked FKBP-12 (*fpr1Δ*) to ensure exclusive pairing of FRB-M48 to Mup1-GFP-FKBP. Cells were grown to mid-log in SD-Met media. Rapamycin induces FRB-RFP localization to Mup1-GFP-FKBP whether it is at the cell surface or trapped within class E endosomal compartments.
- b) With FRB fused to M48, adding Rapamycin stabilized Mup1-GFP-FKBP at the cell surface in the presence of high concentrations of methionine [40.0  $\mu$ g/ml], consistent with previous studies where Mup1-GFP was translationally fused to the UL36 DUB ([Stringer and Piper, 2011](#)). Shown is Mup1-GFP-FKBP or Ste3-GFP-FKBP were co-expressed in *fpr1Δ tor1-1* cells with FRB-DUB and grown in SD+Met to mid-log phase in the presence and absence of 10  $\mu$ M Rapamycin.
- c) Triggered recycling of Mup1-GFP-FKBP occurs more slowly in cells overexpressing Cos5-HA, as detected at the 4 hour time point in some cells. Bar = 5  $\mu$ m.

**Figure S7, related to Figure 7: The sorting of GPI-APs into the MVB pathway**

- a) Model illustrating the topology of GPI-anchored proteins as they travel through the endocytic pathway to the vacuole or to the MVB pathway. Vacuolar proteases could potentially release luminal GFP or YFP fused onto GPI-APs regardless of whether that GPI-AP was delivered to the limiting vacuolar membrane or intraluminal vesicles derived from the MVB sorting pathway.
- b) GPI-APs co-localize with Cos5-RFP in the class E compartment of *vps4Δ* (*Pep*<sup>+</sup>) cells, but a large portion also accesses the lumen of the vacuole, shown by fluorescence microscopy of YFP-Tos6.
- c) Intravacuolar localization of Cos5-RFP, RFP-Gas1, YFP-Ccw14, YFP-Tos6 and YFP-Cwp2 was quantified (n = >150) in wild-type and *vps4Δ* cells.
- d) *pep4Δ* cells expressing YFP-labeled GPI-APs were grown to mid-log phase in media containing 100 μM NA. Localization is compared with *pep4Δ* cells co-expressing Cos5-RFP.
- e) Schematic diagram of Cos5 showing membrane spanning regions (blue) and the mutations within them used to create the TMD\* construct (red, residue changes labeled above). Bar = 5 μm.

## Supplementary Experimental Materials

### Yeast strains used in this study.

| Strain  | Genotype                                                                                                                                                                                                                                                                                                                                                                                                                                                | Use                              | Source                    |
|---------|---------------------------------------------------------------------------------------------------------------------------------------------------------------------------------------------------------------------------------------------------------------------------------------------------------------------------------------------------------------------------------------------------------------------------------------------------------|----------------------------------|---------------------------|
| BY4742  | MAT $\alpha$ <i>his3<math>\Delta</math>0 leu2<math>\Delta</math>0 lys2<math>\Delta</math>0 ura3<math>\Delta</math>0</i>                                                                                                                                                                                                                                                                                                                                 | Throughout                       | (Brachmann et al., 1998)  |
| SEY6210 | MAT $\alpha$ , <i>leu2-3,112 ura3-52 his3-<math>\Delta</math>200 trp1-<math>\Delta</math>901 lys2-801 suc2-<math>\Delta</math>9</i>                                                                                                                                                                                                                                                                                                                     | Throughout                       | (Robinson et al., 1988)   |
|         |                                                                                                                                                                                                                                                                                                                                                                                                                                                         | Figure 1                         |                           |
| ENY60   | BY4742; <i>art1<math>\Delta</math> art2<math>\Delta</math> art3<math>\Delta</math> art4<math>\Delta</math> art6<math>\Delta</math> art7<math>\Delta</math> art8<math>\Delta</math> art10<math>\Delta</math> bsd2<math>\Delta</math></i>                                                                                                                                                                                                                 | 1B & s1a                         | (Nikko and Pelham, 2009)  |
| PLY4032 | BY4742; <i>sir2<math>\Delta</math></i>                                                                                                                                                                                                                                                                                                                                                                                                                  | 1D, 1E & 1F                      | (Winzeler et al., 1999)   |
| PLY4033 | BY4742; <i>rpd3<math>\Delta</math></i>                                                                                                                                                                                                                                                                                                                                                                                                                  | 1D, 1F; s1d; 2G                  | (Winzeler et al., 1999)   |
| PLY4030 | BY4742; <i>sin3<math>\Delta</math></i>                                                                                                                                                                                                                                                                                                                                                                                                                  | s1d; 2G                          | (Winzeler et al., 1999)   |
|         |                                                                                                                                                                                                                                                                                                                                                                                                                                                         | Figure 2                         |                           |
| JPY21   | SEY6210; <i>mvb12<math>\Delta</math>::HIS3</i>                                                                                                                                                                                                                                                                                                                                                                                                          | 2C                               | (Oestreich et al., 2007b) |
| PLY4031 | BY4742; <i>hda1<math>\Delta</math></i>                                                                                                                                                                                                                                                                                                                                                                                                                  | s2c                              | (Winzeler et al., 1999)   |
|         |                                                                                                                                                                                                                                                                                                                                                                                                                                                         | Figure 3                         |                           |
| PLY4624 | BY4742; <i>cos1<math>\Delta</math> cos2<math>\Delta</math> cos3<math>\Delta</math> cos4<math>\Delta</math> cos5<math>\Delta</math> cos6<math>\Delta</math> cos7<math>\Delta</math> cos8<math>\Delta</math> cos9<math>\Delta</math> cos10<math>\Delta</math> cos12<math>\Delta</math> yhl042w<math>\Delta</math> yhl043w<math>\Delta</math> yhl044w<math>\Delta</math> yir043c<math>\Delta</math> yir044c<math>\Delta</math></i>                         | 3A, 3B, 3C, 3D, 3E; s2b, s2d, 7C | This study                |
| PLY4654 | BY4742; <i>cos1<math>\Delta</math> cos2<math>\Delta</math> cos3<math>\Delta</math> cos4<math>\Delta</math> cos5<math>\Delta</math> cos6<math>\Delta</math> cos7<math>\Delta</math> cos8<math>\Delta</math> cos9<math>\Delta</math> cos10<math>\Delta</math> cos12<math>\Delta</math> yhl042w<math>\Delta</math> yhl043w<math>\Delta</math> yhl044w<math>\Delta</math> yir043c<math>\Delta</math> yir044c<math>\Delta</math> sna3<math>\Delta</math></i> | 3E                               | This study                |
|         |                                                                                                                                                                                                                                                                                                                                                                                                                                                         | Figure 4                         |                           |
| LHY23   | MAT $\alpha$ <i>leu2 ura3 his3 trp1 lys2 bar1 rsp5-1</i>                                                                                                                                                                                                                                                                                                                                                                                                | 4A                               | (Dunn and Hicke, 2001)    |
| TVY614  | SEY6210; <i>pep4<math>\Delta</math>::LEU2 prb1<math>\Delta</math>::HISG prc1<math>\Delta</math>::HIS3</i>                                                                                                                                                                                                                                                                                                                                               | 4B                               | (Wurmser and Emr, 1998)   |
| PLY3983 | BY4742; <i>sna3<math>\Delta</math></i>                                                                                                                                                                                                                                                                                                                                                                                                                  | 4F4E?                            | (Winzeler et al., 1999)   |
| PLY4359 | BY4742; <i>bsd2<math>\Delta</math> sna3<math>\Delta</math></i>                                                                                                                                                                                                                                                                                                                                                                                          | 4F 4E?                           | This study                |
| JPY130  | SEY6210; <i>bsd2<math>\Delta</math>::HIS3</i>                                                                                                                                                                                                                                                                                                                                                                                                           | 4F                               | (Lee et al., 2009)        |
| MAY3    | SEY6210; <i>sna3<math>\Delta</math>::HIS3</i>                                                                                                                                                                                                                                                                                                                                                                                                           | 4F                               | (Oestreich et al., 2007a) |
| JPY489  | SEY6210; <i>cos6<math>\Delta</math>::HIS3</i>                                                                                                                                                                                                                                                                                                                                                                                                           | 4F                               | This study                |
| JPY602  | SEY6210; <i>bsd2<math>\Delta</math>::HIS3 cos6<math>\Delta</math>::</i>                                                                                                                                                                                                                                                                                                                                                                                 | 4F                               | This study                |
| JPY597  | SEY6210; <i>cos6<math>\Delta</math>::HIS3 sna3<math>\Delta</math>::HIS3</i>                                                                                                                                                                                                                                                                                                                                                                             | 4F                               | This study                |
| CBY31   | SEY6210; <i>pep12<math>\Delta</math>::LEU2</i>                                                                                                                                                                                                                                                                                                                                                                                                          | 4G; s4b                          | (Burd et al., 1997)       |
| JPY617  | SEY6210; <i>bsd2<math>\Delta</math>::HIS3 pep12<math>\Delta</math>::LEU2 sna3<math>\Delta</math>::HIS3</i>                                                                                                                                                                                                                                                                                                                                              | 4G                               | This study                |
| MBY21   | SEY6210; <i>VPS27::HIS3</i>                                                                                                                                                                                                                                                                                                                                                                                                                             | s4d                              | (Shih et al., 2002)       |
| MBY3    | SEY6210; <i>vps4<math>\Delta</math>::TRP1</i>                                                                                                                                                                                                                                                                                                                                                                                                           | s4d                              | (Babst et al., 1997)      |
| JPY434  | SEY6210; <i>cos1<math>\Delta</math>::HIS3</i>                                                                                                                                                                                                                                                                                                                                                                                                           | s4g                              | This study                |
| JPY425  | SEY6210; <i>cos2/3<math>\Delta</math>::HIS3</i>                                                                                                                                                                                                                                                                                                                                                                                                         | s4g                              | This study                |
| JPY435  | SEY6210; <i>cos4<math>\Delta</math>::HIS3</i>                                                                                                                                                                                                                                                                                                                                                                                                           | s4g                              | This study                |
| MPY1    | SEY6210; <i>cos5<math>\Delta</math>::HIS3</i>                                                                                                                                                                                                                                                                                                                                                                                                           | s4g                              | This study                |
| JPY590  | SEY6210; <i>cos1<math>\Delta</math>::HIS3 sna3<math>\Delta</math>::HIS3</i>                                                                                                                                                                                                                                                                                                                                                                             | s4g                              | This study                |
| JPY592  | SEY6210; <i>cos2/3<math>\Delta</math>::HIS3 sna3<math>\Delta</math>::HIS3</i>                                                                                                                                                                                                                                                                                                                                                                           | s4g                              | This study                |
| JPY594  | SEY6210; <i>cos4<math>\Delta</math>::HIS3 sna3<math>\Delta</math>::HIS3</i>                                                                                                                                                                                                                                                                                                                                                                             | s4g                              | This study                |
| JPY596  | SEY6210; <i>cos5<math>\Delta</math>::HIS3 sna3<math>\Delta</math>::HIS3</i>                                                                                                                                                                                                                                                                                                                                                                             | s4g                              | This study                |
| JPY585  | SEY6210; <i>cos1<math>\Delta</math>::HIS3 bsd2<math>\Delta</math>::HIS3</i>                                                                                                                                                                                                                                                                                                                                                                             | s4g                              | This study                |
| JPY603  | SEY6210; <i>cos2/3<math>\Delta</math>::HIS3 bsd2<math>\Delta</math>::HIS3</i>                                                                                                                                                                                                                                                                                                                                                                           | s4g                              | This study                |
| JPY582  | SEY6210; <i>cos4<math>\Delta</math>::HIS3 bsd2<math>\Delta</math>::HIS3</i>                                                                                                                                                                                                                                                                                                                                                                             | s4g                              | This study                |
| JPY583  | SEY6210; <i>cos5<math>\Delta</math>::HIS3 bsd2<math>\Delta</math>::HIS3</i>                                                                                                                                                                                                                                                                                                                                                                             | s4g                              | This study                |
|         |                                                                                                                                                                                                                                                                                                                                                                                                                                                         | Figure 5                         |                           |
| PLY4095 | BY4742; <i>vps36<math>\Delta</math></i>                                                                                                                                                                                                                                                                                                                                                                                                                 | 5A, 5D; s5b; 6B                  | (Winzeler et al., 1999)   |
| PLY2463 | SEY6210; <i>pep4<math>\Delta</math></i>                                                                                                                                                                                                                                                                                                                                                                                                                 | 5B                               | (Macdonald et al., 2012a) |
| PLY4092 | BY4742; <i>vps4<math>\Delta</math></i>                                                                                                                                                                                                                                                                                                                                                                                                                  | 5E; s5b, s5c; 6B; s7c, s7d       | (Winzeler et al., 1999)   |
| PLY4646 | BY4742; <i>cos1<math>\Delta</math> cos2<math>\Delta</math> cos3<math>\Delta</math> cos4<math>\Delta</math> cos5<math>\Delta</math> cos6<math>\Delta</math> cos7<math>\Delta</math> cos8<math>\Delta</math> cos9<math>\Delta</math> cos10<math>\Delta</math> cos12<math>\Delta</math> yhl042w<math>\Delta</math> yhl043w<math>\Delta</math> yhl044w<math>\Delta</math> yir043c<math>\Delta</math> yir044c<math>\Delta</math> vps4<math>\Delta</math></i> | 5E                               |                           |
| PLY4093 | BY4742; <i>vps23<math>\Delta</math></i>                                                                                                                                                                                                                                                                                                                                                                                                                 | s5c                              | (Winzeler et al., 1999)   |
| PLY4348 | BY4742; <i>did2<math>\Delta</math> vps60<math>\Delta</math> vps2<math>\Delta</math> vps20<math>\Delta</math> vps24<math>\Delta</math> snf7<math>\Delta</math></i>                                                                                                                                                                                                                                                                                       | s5c; 6B                          | This study                |

|         |                                                                                                                                                          | <i>Figure 6</i>      |                              |
|---------|----------------------------------------------------------------------------------------------------------------------------------------------------------|----------------------|------------------------------|
| PLY4168 | BY4742; <i>vps24Δ</i>                                                                                                                                    | 6A, 6B               | (Winzeler et al., 1999)      |
| PLY4169 | BY4742; <i>snf7Δ</i>                                                                                                                                     | 6A, 6B               | (Winzeler et al., 1999)      |
| W303    | MAT $\alpha$ <i>ade 2-1 trp1-1 can1-100 leu2-3,112 his3-11,15 ura3</i>                                                                                   |                      | (Thomas and Rothstein, 1989) |
| KY14708 | W303; <i>tor1-1 fpr1Δ</i>                                                                                                                                | s6b                  | (Haruki et al., 2008)        |
| PLY4575 | W303; <i>tor1-1 fpr1Δ vps4Δ CUP1-HA-FRB-M48 MUP1-GFP-FKBP</i>                                                                                            | 6D                   | This study                   |
| PLY4392 | W303; <i>tor1-1 fpr1Δ vps36Δ</i> (W303)                                                                                                                  | s6a                  | This study                   |
|         |                                                                                                                                                          | <i>Figure 7</i>      |                              |
| PLY2030 | BY4742; <i>pep4Δ</i>                                                                                                                                     | 7A, 7C, 7D; s7b, s7e | (Winzeler et al., 1999)      |
| PLY4099 | SEY6210; <i>pep4Δ vps4Δ</i>                                                                                                                              | 7B                   | (Macdonald et al., 2012a)    |
| PLY4648 | BY4742; <i>cos1Δ cos2Δ cos3Δ cos4Δ cos5Δ cos6Δ cos7Δ cos8Δ cos9Δ cos10Δ cos12Δ yhl042wΔ yhl043wΔ yhl044wΔ yir043cΔ yir044cΔ pep4Δ::LEU2 atg8Δ::KanMX</i> | 3F, 3H, 7E, 7F, 7G   | This study                   |

## Plasmids used in this study.

| Plasmid | Description                                                                       | Use                                                       | Source                       |
|---------|-----------------------------------------------------------------------------------|-----------------------------------------------------------|------------------------------|
| pRS413  | Low copy yeast shuttle plasmid containing <i>HIS3</i> marker                      | Throughout                                                | (Sikorski and Hieter, 1989)  |
| pRS415  | Low copy yeast shuttle plasmid containing <i>LEU2</i> marker                      | Throughout                                                | (Sikorski and Hieter, 1989)  |
| pRS416  | Low copy yeast shuttle plasmid containing <i>URA3</i> marker                      | Throughout                                                | (Sikorski and Hieter, 1989)  |
|         |                                                                                   | <i>Figure 1</i>                                           |                              |
| pCHL642 | pRS416 expressing Mup1-GFP from <i>MUP1</i> promoter                              | 1A, 1B, 1C, 1D, 1E, 1F; s1b; 2F, 2G; s2c; 3A; s3a, 4C; 6B | (Lin et al., 2008)           |
| pCHL571 | pRS416 expressing Can1-GFP from <i>CAN1</i> promoter                              | 1B                                                        | (Lin et al., 2008)           |
| pPL5633 | pRS416 expressing Yor1-GFP from <i>CUP1</i> promoter                              | 1B                                                        | This study                   |
| pPL2583 | pRS416 expressing GFP-Snc1 from <i>TPI1</i> promoter                              | 1B; 3D                                                    | (Burston et al., 2009)       |
| pPL967  | pRS415 expressing Ste3-GFP from <i>STE3</i> promoter                              | s1a; s3b; 6A                                              | (Urbanowski and Piper, 2001) |
| pPL3797 | pRS415 expressing Fur4-GFP from <i>CUP1</i> promoter                              | s1a                                                       | (Stringer and Piper, 2011)   |
| pPL2356 | pRS416 expressing GFP-Cps1 from <i>TPI1</i> promoter                              | s1d                                                       | (Reggiori and Pelham, 2001)  |
|         |                                                                                   | <i>Figure 2</i>                                           |                              |
| pMA27   | pRS416 expressing Cos5-GFP from <i>TDH3</i> promoter                              | 2C, 4A, 4B, 4E, 4G; s4a, s4d, s4e                         | This study                   |
| pPL5000 | pRS416 expressing Cos5-HA from <i>CUP1</i> promoter                               | 2D, 2E, 2F, 2G; 3D, 3E, 4D, 5B, 6A, 6B                    | This study                   |
|         |                                                                                   | <i>Figure 3</i>                                           |                              |
| pPL4147 | pRS415 expressing Mup1-GFP-Ub from <i>CUP1</i> promoter                           | 3A, 3B, s3a                                               | (Stringer and Piper, 2011)   |
| pPL5696 | pRS416 expressing Mup1-GFP-Ub-Ub from <i>CUP1</i> promoter                        | 3B                                                        | This study                   |
| pPL3878 | pRS415 expressing GFP-Ub from <i>PRC1</i> promoter                                | 3C, s5b                                                   | (Bilodeau et al., 2003)      |
| pPL2279 | pRS415 expressing Sna3 <sup>KR</sup> from <i>SNA3</i> promoter Sna3 (K19R, K125R) | 3E                                                        | (MacDonald et al., 2012b)    |
| pPL3484 | pRS415 expressing Ste3-GFP-Ub from <i>STE3</i> promoter                           | s3b                                                       | (Bilodeau et al., 2003)      |

|                            |                                                                                                                                                                                     |                               |                              |
|----------------------------|-------------------------------------------------------------------------------------------------------------------------------------------------------------------------------------|-------------------------------|------------------------------|
|                            |                                                                                                                                                                                     | <i>Figure 4</i>               |                              |
| pMA131                     | pGPD416-Cos5 <sup>KK</sup> -GFP                                                                                                                                                     | 4A, 4B; s4c                   | This study                   |
| pPL5103                    | pRS416 expressing Cos5-GFP-UL36 from <i>CUP1</i> promoter                                                                                                                           | 4A                            | This study                   |
| pPL5003                    | pRS416 expressing Cos5 <sup>KK</sup> -HA from <i>CUP1</i> promoter                                                                                                                  | 4D; 5B                        | This study                   |
| pPL5764                    | pRS416 expressing Cos5 <sup>KK</sup> -HA-myc-Ub from <i>CUP1</i> promoter                                                                                                           | 4D                            | This study                   |
| pGO45                      | pRS426-GFP-Cps1                                                                                                                                                                     | 4F; s4g                       | (Odorizzi et al., 1998)      |
| pGPD414HA-Ub               | pRS414 expressing HA-Ub                                                                                                                                                             | 4G; s4b                       | (Oestreich et al., 2007a)    |
| pJP10                      | GST-Cos4 <sup>CTDZ</sup> (Cos 4 residues 297-380)                                                                                                                                   | 4I; s4f                       | This study                   |
| pJP21                      | GST-Cos5 <sup>CTDZ</sup> (Cos5 residues 299-384)                                                                                                                                    | 4I; s4f                       | This study                   |
| pJP25                      | GST-Cos6 <sup>CTDZ</sup> (Cos6 residues 299-382)                                                                                                                                    | 4I; s4f                       | This study                   |
| GST-Sna3 <sup>CTD</sup>    | GST-Sna3 <sup>CTD</sup>                                                                                                                                                             | 4I; s4f                       | (Oestreich et al., 2007a)    |
| GST-Sna3 <sup>CTDΔPY</sup> | GST-Sna3 <sup>CTDΔPY</sup>                                                                                                                                                          | 4I; s4f                       | (Oestreich et al., 2007a)    |
| pJL242                     | His-MBP-Rsp5 <sup>WI</sup>                                                                                                                                                          | 4I; s4f                       | (Oestreich et al., 2007a)    |
| pMA24                      | pGPD416-Cos1-GFP                                                                                                                                                                    | s4a                           | This study                   |
| pMA25                      | pGPD416-Cos2/3-GFP                                                                                                                                                                  | s4a                           | This study                   |
| pMA26                      | pGPD416-Cos4-GFP                                                                                                                                                                    | s4a                           | This study                   |
| pMA27                      | pGPD416-Cos5-GFP                                                                                                                                                                    | s4a                           | This study                   |
| pMA28                      | pGPD416-Cos6-GFP                                                                                                                                                                    | s4a                           | This study                   |
| pMA132                     | pGPD416-Cos5 <sup>2K</sup> -GFP                                                                                                                                                     | s4c                           | This study                   |
| pMA133                     | pGPD416-Cos5 <sup>TK</sup> -GFP                                                                                                                                                     | s4c                           | This study                   |
| pPL3742                    | pRS416 expressing Rsp5-Ubp7-3xHA Active Ubp7 (catalytic domain)                                                                                                                     | s4e, 7A                       | (Stringer and Piper, 2011)   |
| pPL5128                    | pRS415 expressing Cos5-GFP from <i>TDH3</i> promoter                                                                                                                                | s4e                           | This study                   |
|                            |                                                                                                                                                                                     | <i>Figure 5</i>               |                              |
| pPL5392                    | pRS416 expressing Cos5-mCherry-GFP from <i>CUP1</i> promoter                                                                                                                        | 5A                            | This study                   |
| pPL5390                    | pRS416 expressing Cos5-mCherry from <i>CUP1</i> promoter                                                                                                                            | 5A; s5b; 7G, 7H               | This study                   |
| pPL5128                    | pRS415 expressing Cos5-GFP from <i>TDH3</i> promoter                                                                                                                                | 5A, 5D; 7B, 7F; s7c, s7d, s7e | This study                   |
| pPL5424                    | pRS415 expressing Cos5-mCherry from <i>CUP1</i> promoter                                                                                                                            | 5A; s5a, s5c                  | This study                   |
| pPL1556                    | pRS416 expressing Vph1-GFP-Ub from <i>VPH1</i> promoter                                                                                                                             | 5A, 5D, 5E; s5a, s5c          | (Urbanowski and Piper, 2001) |
| pPL848                     | pRS416 expressing Vph1-GFP from <i>VPH1</i> promoter                                                                                                                                | 5D, 5E; s5a, s5c              | (Urbanowski and Piper, 2001) |
| pPL4147                    | pRS416 expressing Mup1-mCherry-Ub from <i>CUP1</i> promoter                                                                                                                         | 5E                            | (Stringer and Piper, 2011)   |
|                            |                                                                                                                                                                                     | <i>Figure 6</i>               |                              |
| pPL5519                    | pRS416 expressing Cos5-HA from <i>TEF1</i> promoter                                                                                                                                 | 6C, 6D; s6c                   | This study                   |
| pPL3607                    | pRS416 expressing Ste3-mCherry from <i>STE3</i> promoter                                                                                                                            | 6D; s6c                       | (Ren et al., 2008)           |
| pPL5348                    | pRS-ADE2 expressing Mup1-GFP-FKBP from <i>CUP1</i> promoter                                                                                                                         | s6a, s6b                      | This study                   |
| pPL5011                    | pRS416 expressing HA-FRB-mCherry from <i>SNA3</i> promoter                                                                                                                          | s6a                           | This study                   |
| pPL5350                    | pRS-ADE2 expressing Ste3-GFP-FKBP from <i>CUP1</i> promoter                                                                                                                         | s6b                           | This study                   |
|                            |                                                                                                                                                                                     | <i>Figure 7</i>               |                              |
| p416VenusCcw14             | pRS416 expressing Venus-Ccw14 from <i>ADH1</i> promoter                                                                                                                             | 7A, 7E, 7F; s7b, s7d, s7e     | (Castillon et al., 2009)     |
| p416VenusTos6              | pRS416 expressing Venus-Tos6 from <i>ADH1</i> promoter                                                                                                                              | 7B, 7F; s7c, s7d, s7e         | (Castillon et al., 2009)     |
| p416HA-GAS1                | pRS416 expressing HA-Gas1 from <i>GAS1</i> promoter                                                                                                                                 | 7C, 7E, 7G                    | Scott Moye-Rowley            |
| pPL5724                    | pRS416 expressing Myc-Sed1 from <i>MET25</i> promoter, contains the 20 residue N-terminal Alpha factor signal sequence                                                              | 7C                            | This study                   |
| pPL5692                    | pRS416 expressing Myc-Rot1 from <i>MET25</i> promoter, contains the 20 residue N-terminal Alpha factor signal sequence                                                              | 7D                            | This study                   |
| pPL5268                    | pRS415 expressing Cos5-HA from <i>CUP1</i> promoter                                                                                                                                 | 7E                            | This study                   |
| p416VenusCwp2              | pRS416 expressing Venus-Cwp2 from <i>ADH1</i> promoter                                                                                                                              | 7E, 7F; s7b, s7d, s7e         | (Castillon et al., 2009)     |
| pPL5742                    | pRS415 expressing Cos5-TMD*-mCherry from <i>CUP1</i> promoter (K45V, S46Y, P50M, P58L, G83I, P84A, C91I, G92S, L93F, T227A, K231V, R232L, S238M, P240I, R260L, C263F, P264L, G265V) | 7G                            | This study                   |
| pPL5720                    | pRS416 expressing Cos5-TMD*-mCherry from <i>CUP1</i> promoter (K45V, S46Y, P50M, P58L, G83I, P84A, C91I, G92S, L93F, T227A, K231V, R232L, S238M, P240I, R260L, C263F, P264L, G265V) | 7H                            | This study                   |
| pPL5707                    | pRS413 expressing Venus-Ccw14 from <i>ADH1</i> promoter                                                                                                                             | 7H                            | This study                   |



## Supplementary Experimental Procedures

### Generation of the *cos* $\Delta$ null strain

The *COS* gene family, *COS1* – *COS10* and *COS12*, are encoded exclusively in sub-telomeric regions that share regions of high homology. The strategy to delete the entire family of *COS* related genes involved several technical considerations due to this high level of homology between different *COS* loci, not only within the open reading frame (ORF) but also extending far into the 5' and 3' untranslated regions (UTRs). We designed a nested gene disruption strategy to non-specifically delete *COS* genes, whereby progressively smaller integration cassettes are used to target *only* the remaining *COS* genes. Disruption cassettes that confer resistance to G418 (*kanMX*) and histidine prototrophy (*HIS5*) were sequentially integrated at 2 loci and yeast selected for both markers prior to expression of *cre*-recombinase to recycle the markers for further rounds of disruption.

Every cassette integration, and subsequent *loxP* recombination, was confirmed by PCR analysis of isolated genomic DNA (gDNA). The homology between different *COS* genes was so high that even short oligonucleotides, to confirm loci had been correctly modified, could not distinguish between certain pairs of *COS* genes (*COS1* & *COS4*, *COS2* & *COS6*, *COS5* & *COS7*). For this reason, these pairs were never targeted in the same round of *KanMX* and *HIS5* integrations. Instead, one of the genes was targeted first and converted to a *loxP* site before the remaining gene was disrupted.

We found integrations that remove large regions of the telomeres were unsuccessful, possibly because such deletions prove lethal. To avoid this, we used a gene disruption strategy where the *COS* promoter sequence, the start codon and a portion of the ORF were replaced with a *loxP* marked cassette. The insertion was designed to leave a *loxP* scar containing a stop codon and shifting the frame of the remaining ORF following Cre-recombinase activity. The largest of the non-specific cassettes targeted ~150 bp of 5' promoter sequence and ~500 bp of the ORF; the smallest cassette targeted ~100 bp of 5' promoter sequence and ~250 bp of the ORF.

It was difficult to avoid targeting the 2 reported *COS* pseudogenes (*YHL042* / *YHL043W* / *YHL044W* and *YIR04C* / *YIR044C*) using our generalized strategy, so we also disrupted these loci. Although these loci are denoted as pseudogenes in the reference genome of strain S288c, it remains unclear whether these loci truly do not encode functional proteins. The *DUP380* locus

*YHL043W* is reported to be a non-functional pseudogene due to the insertion of a frame shifting nucleotide approximately half way through the ORF. However, many strains sequenced and documented in the *Saccharomyces* Genome database (SGD) do not report this insertion and report a *bona fide* and un-assigned member of the *COS* gene family. Less sequence data is available for *YIR044C* to define stop codon insertion frequency. However, the sequence identity of the *YIR04C* / *YIR044C* is extremely similar to the *COS* gene consensus and is denoted only as a pseudogene on account of a single nucleotide insertion that prematurely encodes termination.

### **Pulse-chase analysis**

Pulse-chase analysis of Cos5-GFP and Cos5<sup>KR</sup>-GFP was performed using methods as previously described ([Babst et al., 2002](#)). Cos5 was detected with monoclonal anti-GFP AV-JL8 (Clontech). Quantitation was performed using phosphorimaging screens and a Storm 84 System (GE Healthcare, Little Chalfont, Buckinghamshire, United Kingdom).

### **In vitro binding studies**

Expression and purification of Rsp5 recombinant proteins and immunoprecipitation and in vitro binding experiments were performed as described previously ([Lee et al., 2009](#)). BL21 *E. coli* (Stratagene) expressing His-MBP-Rsp5 and GST- Cos4<sup>ctd</sup>, GST- Cos5<sup>ctd2</sup>, GST- Cos6<sup>ctd2</sup>, GST- Sna3<sup>ctd</sup>, GST- Sna3<sup>ctdΔpy</sup> constructs were induced with 0.5mM IPTG at 37<sup>0</sup> for 4 hours, lysed and stored at -80<sup>0</sup>C. Binding studies were performed as previously described in ([Oestreich et al., 2007a](#)). Samples were subjected to SDS-PAGE and Western blotting. Binding to His-MBP-Rsp5 was detected with monoclonal anti-MBP (Sigma).

### **Bafilomycin induced sorting of GPI-APs**

During the course of these studies we discovered that the V-ATPase inhibitor Bafilomycin enhanced GPI-AP sorting to the vacuole, albeit through an unknown mechanism. We typically add 1 μM Bafilomycin to yeast cells grown in minimal media and find this is sufficient to rapidly direct GPI-APs into the vacuole, as measured by both intravacuolar delivery of fluorescently tagged proteins expressed in *pep4Δ* cells by microscopy and enhanced degradation of total protein levels shown by immunoblot.

## *Supplementary References*

Babst, M., Katzmann, D.J., Snyder, W.B., Wendland, B., and Emr, S.D. (2002). Endosome-associated complex, ESCRT-II, recruits transport machinery for protein sorting at the multivesicular body. *Dev Cell* 3, 283-289.

Babst, M., Sato, T.K., Banta, L.M., and Emr, S.D. (1997). Endosomal transport function in yeast requires a novel AAA-type ATPase, Vps4p. *EMBO J* 16, 1820-1831.

Bedalov, A., Gathbonton, T., Irvine, W.P., Gottschling, D.E., and Simon, J.A. (2001). Identification of a small molecule inhibitor of Sir2p. *Proc Natl Acad Sci USA* 98, 15113-15118.

Bernstein, B.E., Tong, J.K., and Schreiber, S.L. (2000). Genomewide studies of histone deacetylase function in yeast. *Proc Natl Acad Sci USA* 97, 13708-13713.

Bilodeau, P.S., Winistorfer, S.C., Kearney, W.R., Robertson, A.D., and Piper, R.C. (2003). Vps27-Hse1 and ESCRT-I complexes cooperate to increase efficiency of sorting ubiquitinated proteins at the endosome. *J Cell Biol* 163, 237-243.

Brachmann, C.B., Davies, A., Cost, G.J., Caputo, E., Li, J., Hieter, P., and Boeke, J.D. (1998). Designer deletion strains derived from *Saccharomyces cerevisiae* S288C: a useful set of strains and plasmids for PCR-mediated gene disruption and other applications. *Yeast* 14, 115-132.

Burd, C.G., Peterson, M., Cowles, C.R., and Emr, S.D. (1997). A novel Sec18p/NSF-dependent complex required for Golgi-to-endosome transport in yeast. *Mol Biol Cell* 8, 1089-1104.

Burston, H.E., Maldonado-Baez, L., Davey, M., Montpetit, B., Schluter, C., Wendland, B., and Conibear, E. (2009). Regulators of yeast endocytosis identified by systematic quantitative analysis. *J Cell Biol* 185, 1097-1110.

Castillon, G.A., Watanabe, R., Taylor, M., Schwabe, T.M., and Riezman, H. (2009). Concentration of GPI-anchored proteins upon ER exit in yeast. *Traffic* 10, 186-200.

Dunn, R., and Hicke, L. (2001). Domains of the Rsp5 ubiquitin-protein ligase required for receptor-mediated and fluid-phase endocytosis. *Mol Biol Cell* 12, 421-435.

Gasch, A.P., Spellman, P.T., Kao, C.M., Carmel-Harel, O., Eisen, M.B., Storz, G., Botstein, D., and Brown, P.O. (2000). Genomic expression programs in the response of yeast cells to environmental changes. *Mol Biol Cell* 11, 4241-4257.

Haruki, H., Nishikawa, J., and Laemmli, U.K. (2008). The anchor-away technique: rapid, conditional establishment of yeast mutant phenotypes. *Mol Cell* *31*, 925-932.

Lee, J.R.E., Oestreich, A.J., Payne, J.A., Gunawan, M.S., Norgan, A.P., and Katzmann, D.J. (2009). The HECT domain of the ubiquitin ligase Rsp5 contributes to substrate recognition. *J Biol Chem* *284*, 32126-32137.

Lin, C.H., MacGurn, J.A., Chu, T., Stefan, C.J., and Emr, S.D. (2008). Arrestin-related ubiquitin-ligase adaptors regulate endocytosis and protein turnover at the cell surface. *Cell* *135*, 714-725.

Macdonald, C., Buchkovich, N.J., Stringer, D.K., Emr, S.D., and Piper, R.C. (2012a). Cargo ubiquitination is essential for multivesicular body intraluminal vesicle formation. *EMBO Rep* *13*, 331-338.

MacDonald, C., Stringer, D.K., and Piper, R.C. (2012b). Sna3 Is an Rsp5 Adaptor Protein that Relies on Ubiquitination for Its MVB Sorting. *Traffic*.

MacGurn, J.A., Hsu, P.-C., Smolka, M.B., and Emr, S.D. (2011). TORC1 regulates endocytosis via Npr1-mediated phosphoinhibition of a ubiquitin ligase adaptor. In *Cell*, pp. 1104-1117.

Nikko, E., and Pelham, H.R. (2009). Arrestin-mediated endocytosis of yeast plasma membrane transporters. *Traffic* *10*, 1856-1867.

Odorizzi, G., Babst, M., and Emr, S.D. (1998). Fab1p PtdIns(3)P 5-kinase function essential for protein sorting in the multivesicular body. *Cell* *95*, 847-858.

Oestreich, A.J., Aboian, M., Lee, J., Azmi, I., Payne, J., Issaka, R., Davies, B.A., and Katzmann, D.J. (2007a). Characterization of multiple multivesicular body sorting determinants within Sna3: a role for the ubiquitin ligase Rsp5. *Mol Biol Cell* *18*, 707-720.

Oestreich, A.J., Davies, B.A., Payne, J.A., and Katzmann, D.J. (2007b). Mvb12 is a novel member of ESCRT-I involved in cargo selection by the multivesicular body pathway. *Mol Biol Cell* *18*, 646-657.

Reggiori, F., and Pelham, H.R. (2001). Sorting of proteins into multivesicular bodies: ubiquitin-dependent and -independent targeting. *EMBO J* *20*, 5176-5186.

Ren, J., Pashkova, N., Winistorfer, S., and Piper, R.C. (2008). DOA1/UFD3 plays a role in sorting ubiquitinated membrane proteins into multivesicular bodies. *J Biol Chem* *283*, 21599-21611.

Robinson, J.S., Klionsky, D.J., Banta, L.M., and Emr, S.D. (1988). Protein sorting in *Saccharomyces cerevisiae*: isolation of mutants defective in the delivery and processing of multiple vacuolar hydrolases. *Mol Cell Biol* 8, 4936-4948.

Shih, S.C., Katzmann, D.J., Schnell, J.D., Sutanto, M., Emr, S.D., and Hicke, L. (2002). Epsins and Vps27p/Hrs contain ubiquitin-binding domains that function in receptor endocytosis. *Nat Cell Biol* 4, 389-393.

Sikorski, R.S., and Hieter, P. (1989). A system of shuttle vectors and yeast host strains designed for efficient manipulation of DNA in *Saccharomyces cerevisiae*. *Genetics* 122, 19-27.

Stringer, D.K., and Piper, R.C. (2011). A single ubiquitin is sufficient for cargo protein entry into MVBs in the absence of ESCRT ubiquitination. *J Cell Biol* 192, 229-242.

Thomas, B.J., and Rothstein, R. (1989). Elevated recombination rates in transcriptionally active DNA. *Cell* 56, 619-630.

Urbanowski, J.L., and Piper, R.C. (2001). Ubiquitin sorts proteins into the intraluminal degradative compartment of the late-endosome/vacuole. *Traffic* 2, 622-630.

Winzler, E.A., Shoemaker, D.D., Astromoff, A., Liang, H., Anderson, K., Andre, B., Bangham, R., Benito, R., Boeke, J.D., Bussey, H., *et al.* (1999). Functional characterization of the *S. cerevisiae* genome by gene deletion and parallel analysis. *Science* 285, 901-906.

Wurmser, A.E., and Emr, S.D. (1998). Phosphoinositide signaling and turnover: PtdIns(3)P, a regulator of membrane traffic, is transported to the vacuole and degraded by a process that requires luminal vacuolar hydrolase activities. *EMBO J* 17, 4930-4942.
